# Supplementary material
Source: Springer Nature journal article supplement (https://www.springermedizin.de/resource/supplementary/12913_2012_2664_MOESM5_ESM.pdf/9531118)

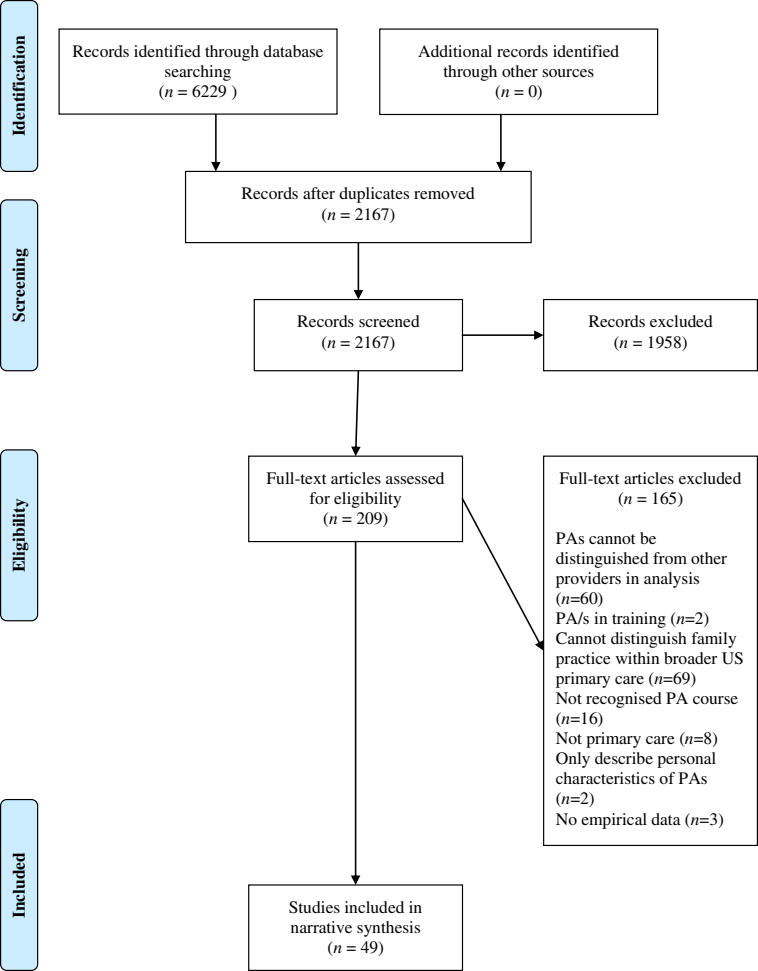

Supplement: MOESM5 [file 9531118]
